# Supplementary material for: Characterization and induction of prophages in human gut-associated Bifidobacterium hosts
Source: PubMed Central journal article supplement (PMC6109161; doi:10.1038/s41598-018-31181-3), 2018-08-24

1  
2  
3  
4  
5  
6  
7  
8  
9  
10  
11  
12  
13  
14

Characterization and induction of prophages in human gut-associated *Bifidobacterium* hosts

Travis N. Mavrich, Eoghan Casey, Joana Oliveira, Francesca Bottacini, Kieran James, Charles  
M.A.P. Franz, Gabriele A. Lugli, Horst Neve, Marco Ventura, Graham F. Hatfull, Jennifer  
Mahony, Douwe van Sinderen

Supplementary Information

## 15 **Supplementary Materials and Methods**

16

17 **Optimization of mitomycin C induction.** Mitomycin C concentration was optimized using 96-  
18 well microtiter plates. Wells with 500  $\mu$ l RCM were inoculated from *B. breve* JCM 7017, *B. breve*  
19 UCC2003, and *B. breve* 017W4-39 cultures, grown for 8 h, and treated with a 10-fold serial  
20 titration of mitomycin C (ranging from 0.0003  $\mu$ g/ml to 3  $\mu$ g/ml) for 14 h. Growth inhibition was  
21 observed for concentrations at and above 0.03  $\mu$ g/ml. Similar inhibitory profiles were observed  
22 with 0.03  $\mu$ g/ml mitomycin C for 2.5 ml, but not 50 ml, cultures. Therefore, for 50 ml cultures, 0.3  
23  $\mu$ g/ml mitomycin C was used.

24

25 **Induction verification using PCR.** Prophage induction was confirmed by PCR amplification  
26 across the *attP* site that forms after excision and circularization. One pair of primers was  
27 designed to test *dnaJ*<sub>2</sub>-integrated phages (5'-TCCGTAAAAACAGGTAAAAACCG-3', 5'-  
28 AAACGTTGGAATCACGCCATTCC-3'). Separate primer pairs were designed for Bb447phi1 (5'-  
29 GTCACACCCACCAGAATCATGAATC-3', 5'-GTTAAGAAGACTTGCTGATGGAGTTG-3') and  
30 Bb423phi2 (5'-CGAACCACTGTGTCATCATCTC-3', 5'-AGCGAGATAACTTGGACGATCAAC-  
31 3'). Induction of previously described prophages in strains *B. choerinum* LMG 10510 and *B.*  
32 *moukalabense* DSM 27321 was confirmed using previously described primers<sup>19</sup>. Amplification  
33 proceeded in 25  $\mu$ l reactions containing 1  $\mu$ l filtered supernatant with Taq polymerase according  
34 to manufacturer's instructions, using a thermocycler protocol of 25-30 cycles of denaturation at  
35 94°C for 30 s, annealing at 55°C for 30 s, and extension at 72°C for 1 min.

36

37 **Plaque assays.** Plaque generation was attempted using a variety of phage samples, indicator  
38 strains, and growth media. To test for spontaneous phage release, filtered supernatants of  
39 saturated cultures were used. To test for mitomycin C-induced phage release, filtered  
40 supernatants or PEG precipitated samples from mitomycin C-treated cultures (as generated for

41 flow cytometry) were used. Confluent lawns were prepared by mixing 4.5 ml Reinforced  
42 Clostridial Top Agar (30 ml Reinforced Clostridial Agar + 60 ml RCM, with or without 2 mM  
43 CaCl<sub>2</sub>) with 200-300 µl saturated bifidobacterial culture (grown overnight directly from a freezer  
44 stock) and allowed to solidify on RCA plates. For each phage sample, 3-5 µl was spotted onto  
45 the overlay and allowed to dry, and plates were incubated at 37°C in an anaerobic chamber for  
46 24-48 h. Phage samples were generated from several lysogens (*B. choerinum* LMG 10510 and  
47 *B. moukalabense* DSM 27321) and predicted lysogens (*B. breve* 082W4-8, *B. breve* 180W8-3,  
48 *B. breve* 139W4-23, *B. breve* 017W4-39, and *B. breve* 215W4-47a), and they were tested  
49 against all of the originating lysogens and predicted lysogens as well as several non-lysogens  
50 (*B. breve* JCM 7017, *B. breve* NCIMB 702258, and *B. breve* UCC2003). As an alternative to  
51 spotting, some saturated cultures were directly mixed with phage samples in a 1.5 ml tube and  
52 aerobically incubated on the bench at room temperature for 10-15 min prior to being mixed with  
53 top agar and poured as an overlay. Additionally, TOS media (Sigma) was used as an alternative  
54 to RCM.

55

56 **Rin shufflon inversion analysis in uninduced Bb423phi1.** Genomic inversions within the Rin  
57 shufflon of the uninduced Bb423phi1 prophage were identified in previously reported *B. breve*  
58 139W4-23 raw whole genome sequencing reads<sup>18</sup>. Pacbio long reads (average read length >10  
59 kb) that map across the Rin shufflon locus (coordinates 1,307,900 to 1,310,888) with at least  
60 80% sequence identity were selected using BLAT aligner v36x2. Variant shufflon orientations in  
61 this subset of reads were identified using dotplot alignments in mummer v3.0. Sequence  
62 coverage of each variant was computed using the identified long reads as reference sequences  
63 and performing a mapping assembly using the RS\_Resequencing.1 protocol implemented in  
64 SMRT Analysis portal v2.3. The resulting assembled reads were inspected using the Next  
65 Generation Sequencing (NGS) visualization tool Tablet (<https://ics.hutton.ac.uk/>).

66

67 **Gene content flux analysis.** Changes in gene content and nucleotide sequence similarity were  
68 computed as previously described<sup>53</sup>. Briefly, for each bifidophage genome, pairwise nucleotide  
69 distances to all other actinobacteriophages were computed using Mash, and gene content  
70 dissimilarities were computed using pham designations in Phamerator. Each phage's  
71 evolutionary mode is predicted by assessing the distribution of pairwise genomic similarities  
72 using previously determined mode boundaries.

73

74

75 **Supplementary Figure Legends**

76

77 **Supplementary Figure S1. Mitomycin C treatment increases bifidoprohage excision.**

78 Excision and circularization of the predicted prophages were examined by PCR. **a**, Primers  
79 (arrows) were designed in all predicted prophages so that they are divergent in the integrated  
80 genome orientation but convergent in the excised and circularized genome to amplify across the  
81 *attP*. **b**, Prophage induction was tested in several strains by PCR amplification of filtered culture  
82 supernatants (F.S.) treated (+) or not treated (-) with mitomycin C. Three to four replicates were  
83 tested per strain. For each prophage of interest, a no template control (NTC) and several  
84 unfiltered saturated cultures (S.C.) were included as negative and positive controls. The full  
85 length of each lane from the loading well to leading edge is displayed. A star (\*) indicates the  
86 expected band size corresponding to *attP* amplification.

87

88 **Supplementary Figure S2. Mitomycin C treatment increases *dnaJ*<sub>2</sub>-integrated**

89 **bifidoprohage copy number.** DNA from mitomycin C-treated culture supernatants was  
90 sequenced for several *B. breve* strains and reads were mapped to the lysogen genome (black  
91 line). Enlarged view of the integrated prophage (white box) locus in each strain highlights the  
92 increased sequencing coverage of the prophage relative to the host genome.

93

94 **Supplementary Figure S3. Flow cytometry calibration and gating strategy. a**, FACSCalibur

95 settings were calibrated using mitomycin C-treated *L. lactis* non-lysogen (strain UC509.9) and  
96 lysogen (strain NZ9000 with TP901-1 prophage) samples. Scatterplots comparing forward  
97 scatter (FSC-H) to (bottom) side scatter (SSC-H) and (top) Syto9 fluorescence (FL1-H) were  
98 adjusted to reproduce previously described results<sup>41</sup>. **b**, Flow cytometry of several negative

99 controls, plotted as in panel **a**, to identify different types of events to gate. Samples include flow  
100 sample buffer (¼ strength Ringer's solution), flow sample buffer with reference microsphere

101 beads ( $\frac{1}{4}$  strength Ringer's solution + Beads), and growth medium processed with the entire  
102 protocol (RCM). **c**, Flow cytometry of common bifidobacterial growth media (MRS, MMRS +  
103 Glucose, TOS), plotted as in panel **b**. **d**, Boxplots of individual parameters (FSC-H, SSC-H,  
104 FL1-H) from flow cytometry results for several strain-free controls are used to define boundaries  
105 of each parameter for debris (beige) and bead (blue) events. Some samples have been treated  
106 (+) or not treated (-) with mitomycin C (MmC), Syto9 stain, and beads. **e**, Boundaries defined in  
107 panel **d** were used to create three-dimensional debris and bead gates. The gating strategy for  
108 all flow cytometry samples utilizes these two gates for removal of debris events followed by  
109 removal of bead events. All non-debris and non-bead "gated" events are used for downstream  
110 analysis to assess levels of prophage induction.

111

#### 112 **Supplementary Figure S4. Flow cytometric analysis of mitomycin C-treated**

113 **bifidobacterial samples.** Gated events from one representative replicate of each sample type  
114 are plotted. Scatterplots of FSC-H and SSC-H (left) and density plots of FL1-H (right) comparing  
115 events either between mitomycin C-treated *L. lactis* non-lysogenic UC509.9 (blue) and  
116 lysogenic NZ9000(TP901-1) (red) strain samples or between mitomycin C-treated (red) and  
117 untreated (blue) bifidobacterial growth medium (RCM) and strain samples.

118

#### 119 **Supplementary Figure S5. Mitomycin C induced changes in supernatant composition. a,**

120 For all gated events from each replicate set of paired mitomycin C treated (red) and untreated  
121 (blue) samples (from Supplementary Fig. S4), (top) barplot of the proportion of total events and  
122 (bottom) boxplots of event fluorescence (FL1-H) highlight changes in supernatant composition.  
123 Replicate sets are numbered. Individual strain names are indicated along with whether they are  
124 non-lysogens, lysogens, or predicted lysogens. RCM = growth medium with no cell culture. *L.*  
125 *lactis* untreated = mitomycin C-treated non-lysogen (UC509.9); *L. lactis* treated = mitomycin C-

126 treated lysogen (NZ9000 with TP901-1 prophage). **b**, Boxplots display the fold changes in the  
127 (top) abundance and (bottom) median fluorescence of events from paired samples in panel **a**.

128

129 **Supplementary Figure S6. Bifidoprophages contain phase variation systems. a**, Enlarged  
130 view of the left arm genes of *dnaJ<sub>2</sub>*-integrated prophages from Fig. 1a highlights the genomic  
131 context of the Rin shufflon. Genes are colored according to pham designation, and any putative  
132 functions are listed (TMP = tape measure protein; DIT = distal tail protein; RBP = receptor  
133 binding protein). The color spectrum between genomes is the same as in Fig. 1a. **b**, Enlarged  
134 view of the left arm genes of tRNA<sup>Met</sup>-integrated phages from Fig. 1c highlights a putative phase  
135 variation system in these genomes.

136

137 **Supplementary Figure S7. Bb423phi1 induced phage genomes harbor multiple Rin**  
138 **shufflon variants. a**, Three contigs (numbered by size) representing the entire phage genome  
139 are assembled by Newbler, but a 100% consensus of the complete genome is not achieved.  
140 Contigs can be connected in multiple arrangements due to reads mapping across more than  
141 one contig, and these discrepant reads occur near or within the RBP locus (colors and gene  
142 numbering as in Fig. 5a). **b**, One possible contig orientation involves reads that straddle the  
143 three contigs (dashed lines) with approximately equal coverage. **c**, Other contig orientations are  
144 possible, but they are represented by much lower read coverage and they do not obviously  
145 assemble into a single alternative genome. **d**, Two sequential inversion events (double arrows)  
146 at *rix* sites result in three shufflon variants that sufficiently account for all hybrid sequence reads.

147

148 **Supplementary Figure S8. Bb423phi1 uninduced prophage genomes harbor multiple Rin**  
149 **shufflon variants.** Analysis of the previously reported *B. breve* 139W4-23 genome sequencing  
150 reads<sup>18</sup> reveals three variant orientations of the Bb423phi1 prophage Rin shufflon. (Left) The  
151 variant nucleotide sequence orientations were assembled and all reads in the sample were

152 mapped to each variant. The genome map below the histogram and the coordinates above the  
153 histogram reflect the predominant variant in the published genome. The points of inversion in  
154 each variant are indicated below (double arrows and coordinates). Average coverage across  
155 each variant is indicated by the dotted line, and the percentage of all reads in the sample that  
156 map to the variant orientation is indicated. (Right) Dotplot sequence comparison of each variant  
157 to the published prophage locus orientation highlights the points of inversion.

158

159 **Supplementary Figure S9. *dnaJ*<sub>2</sub>-integrated prophages exhibit high gene content flux.**

160 Pairwise comparisons (black circles) of nucleotide sequence and gene content between *dnaJ*<sub>2</sub>-  
161 integrated phages and all other actinobacteriophages as previously described<sup>53</sup> to highlight  
162 gene content flux patterns, with high (HGCF, blue) and low (LGCF, green) gene content flux  
163 regions indicated.

164

165

166



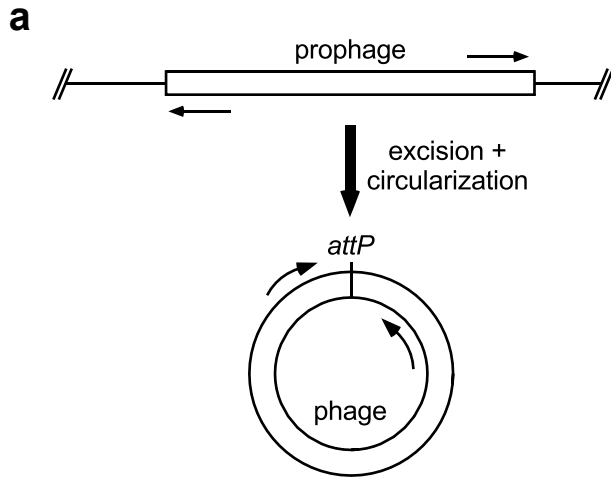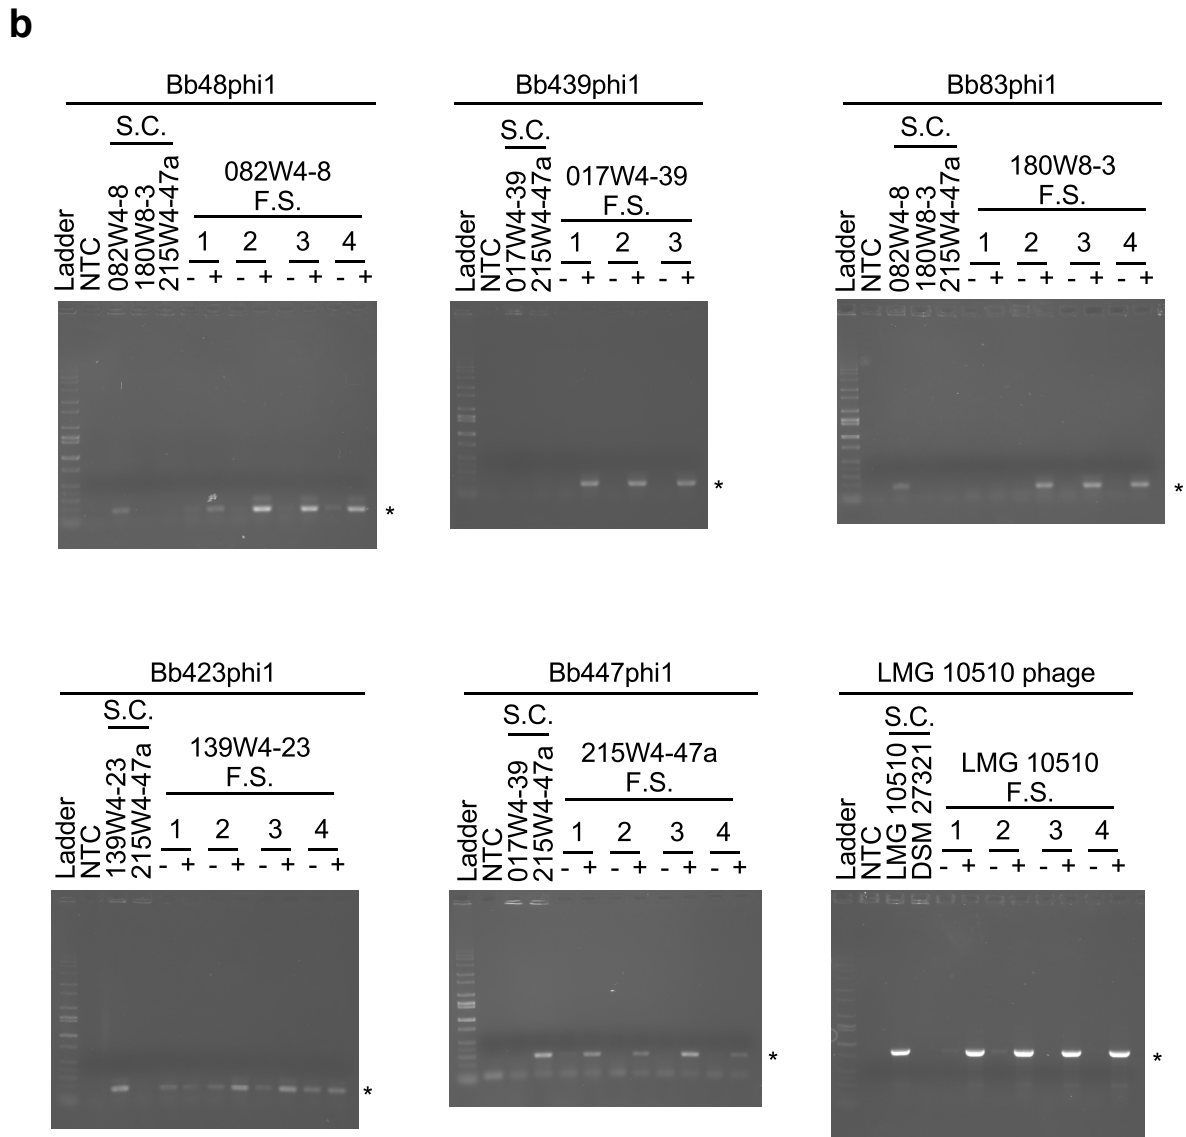

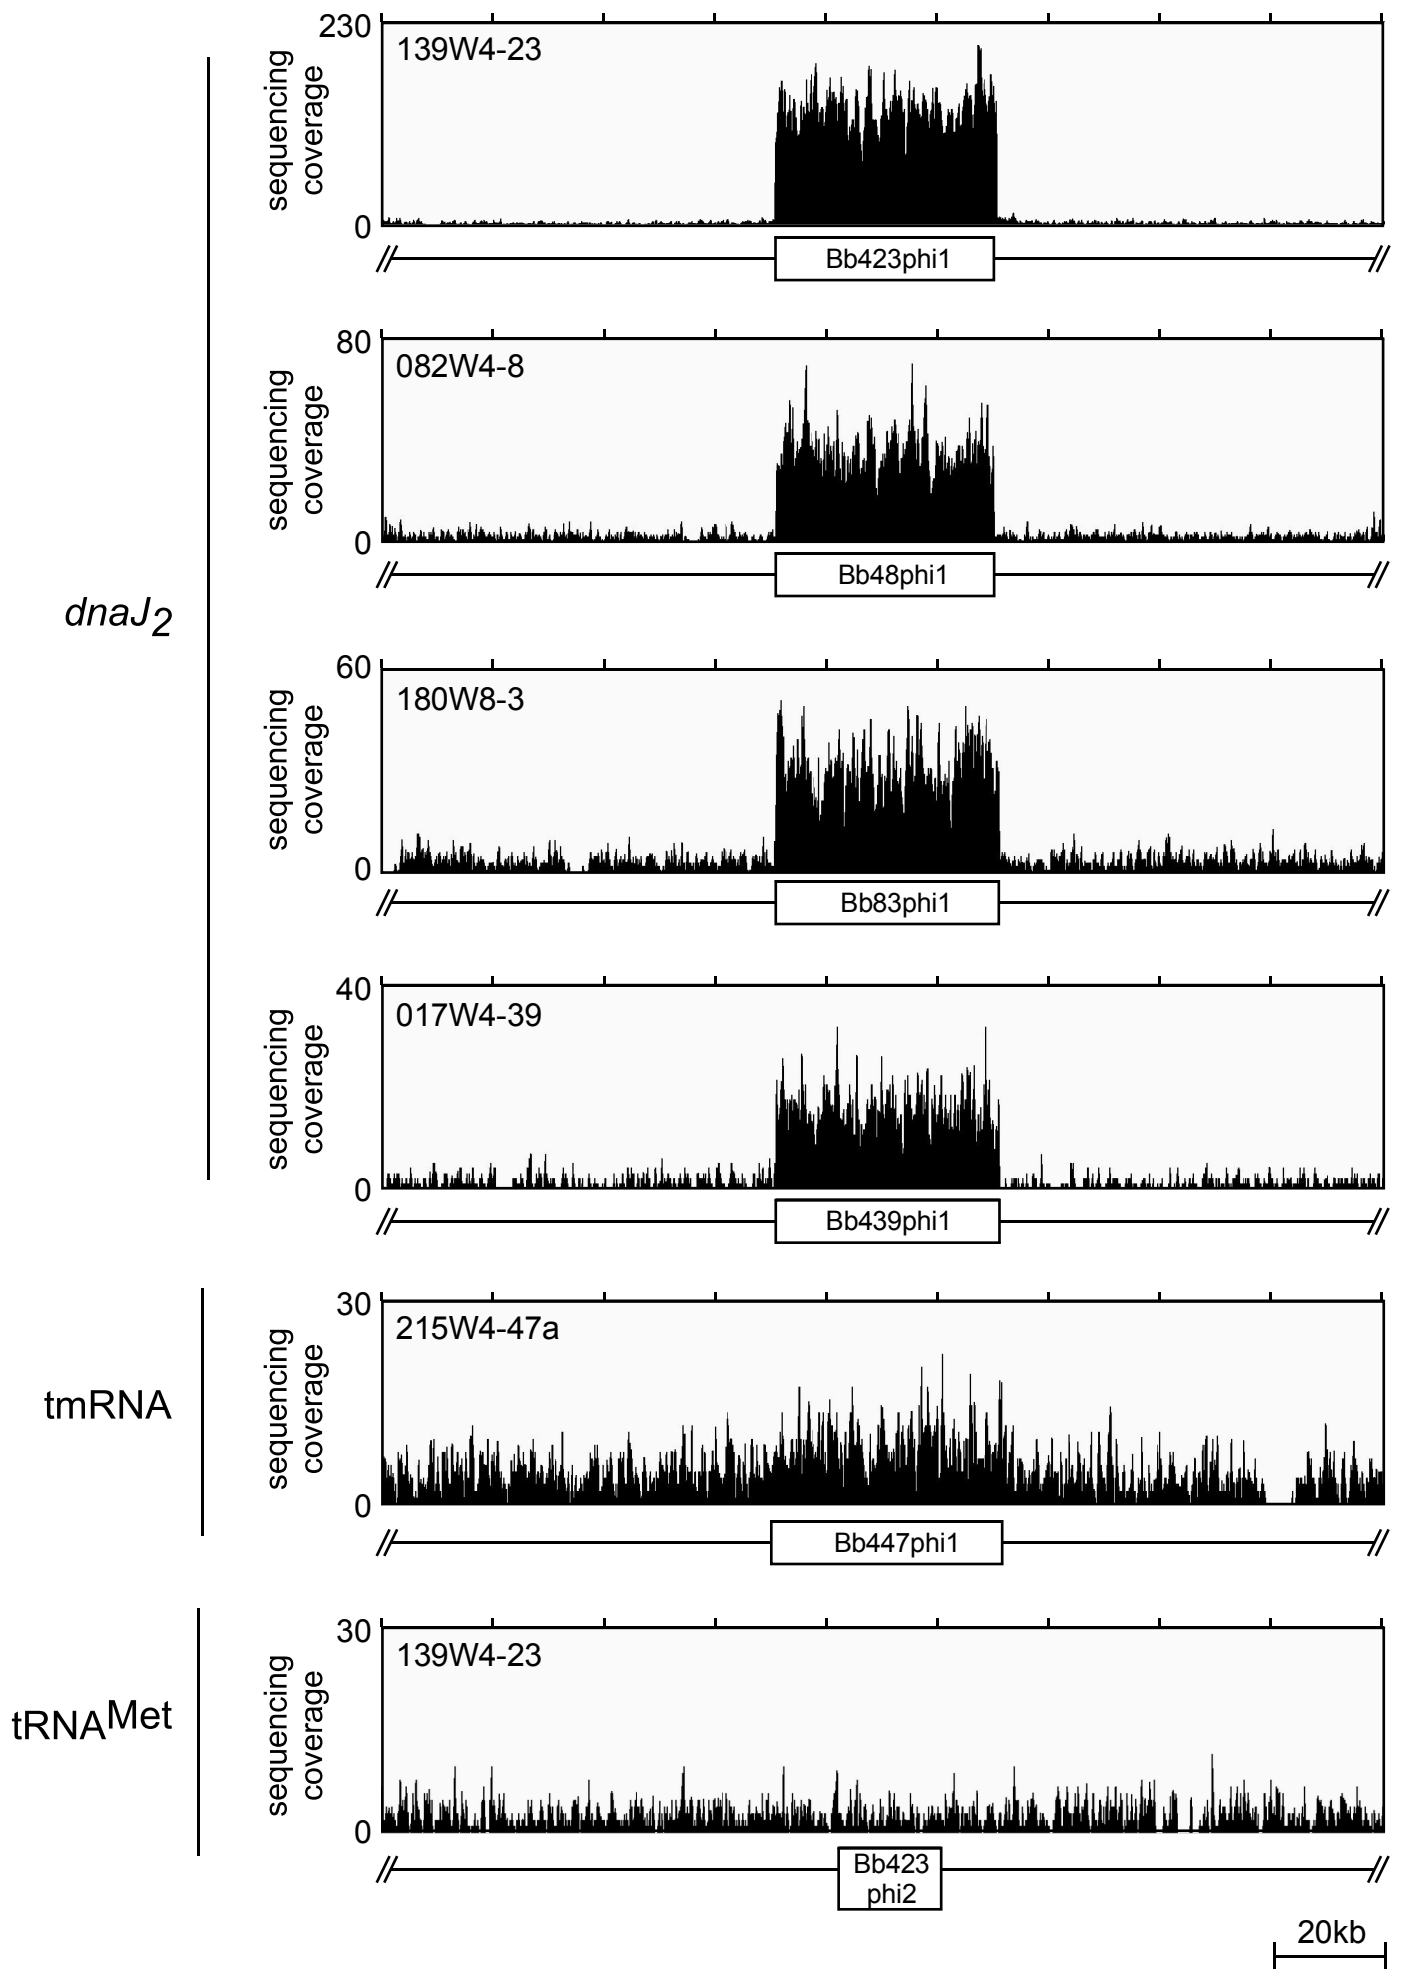

Supplementary Figure S2

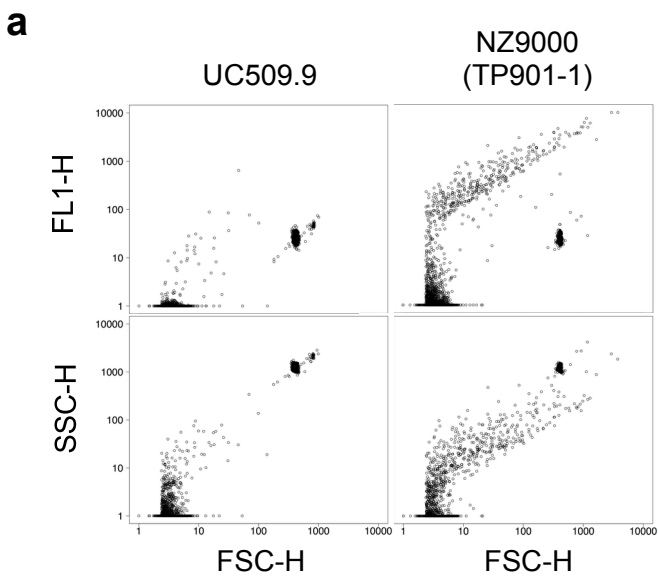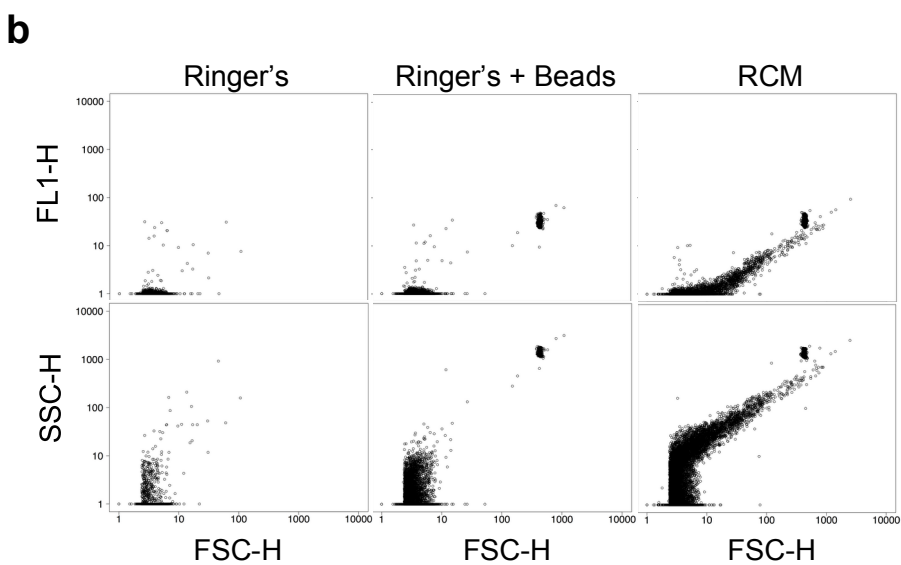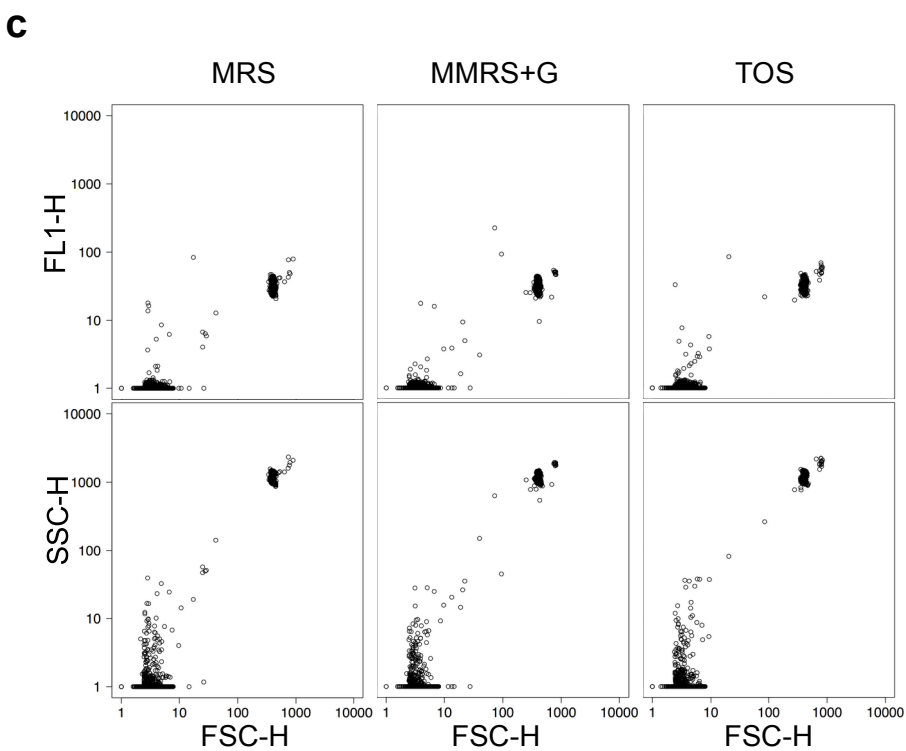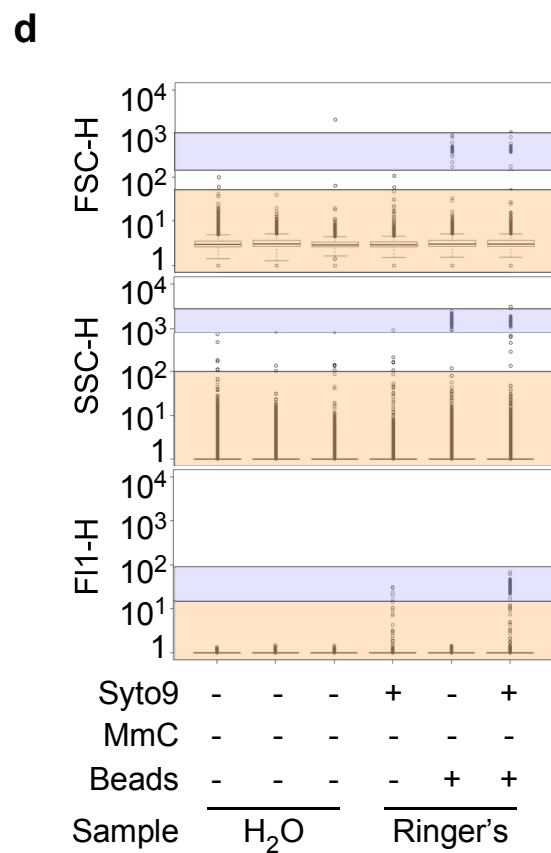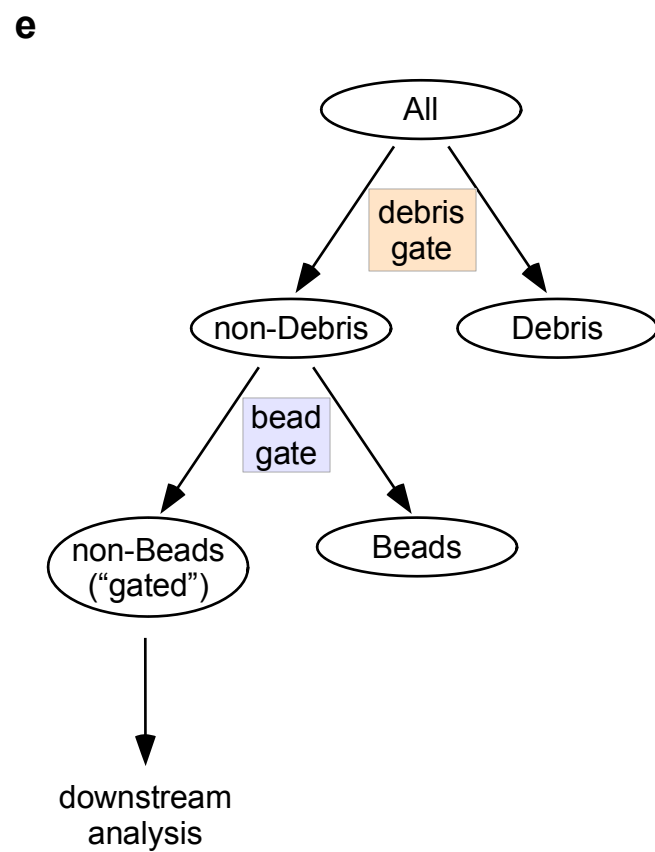

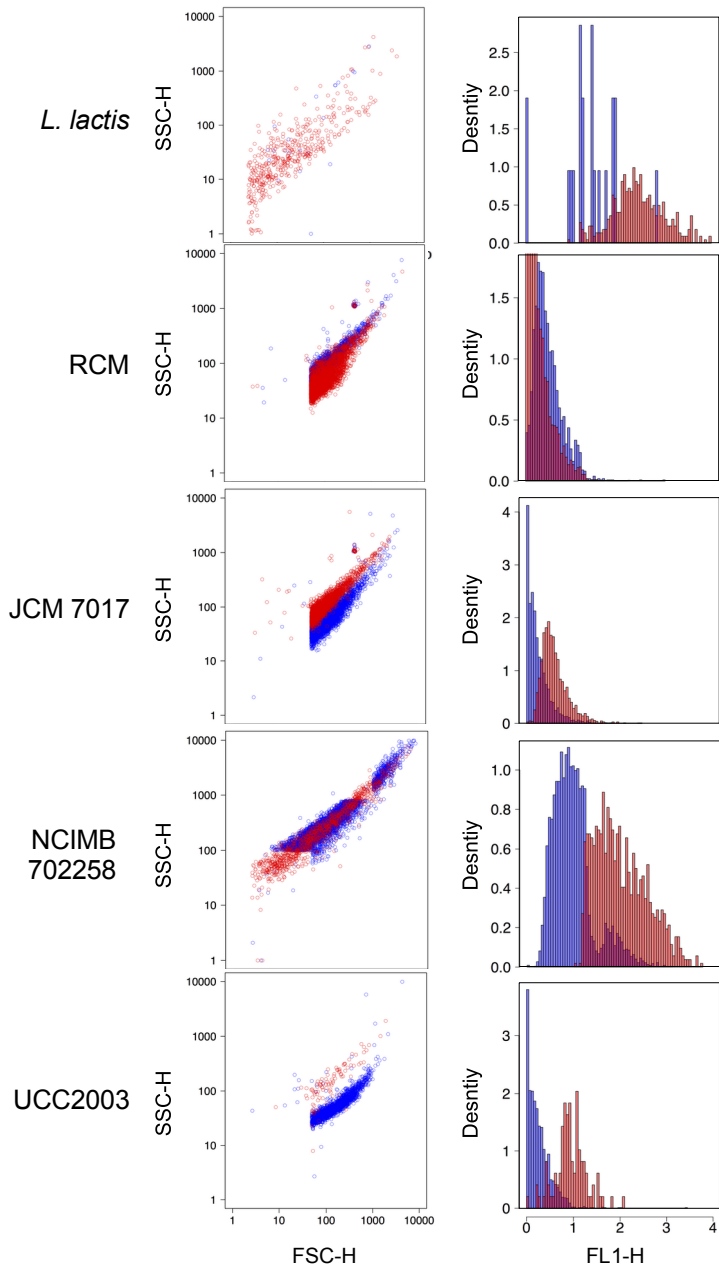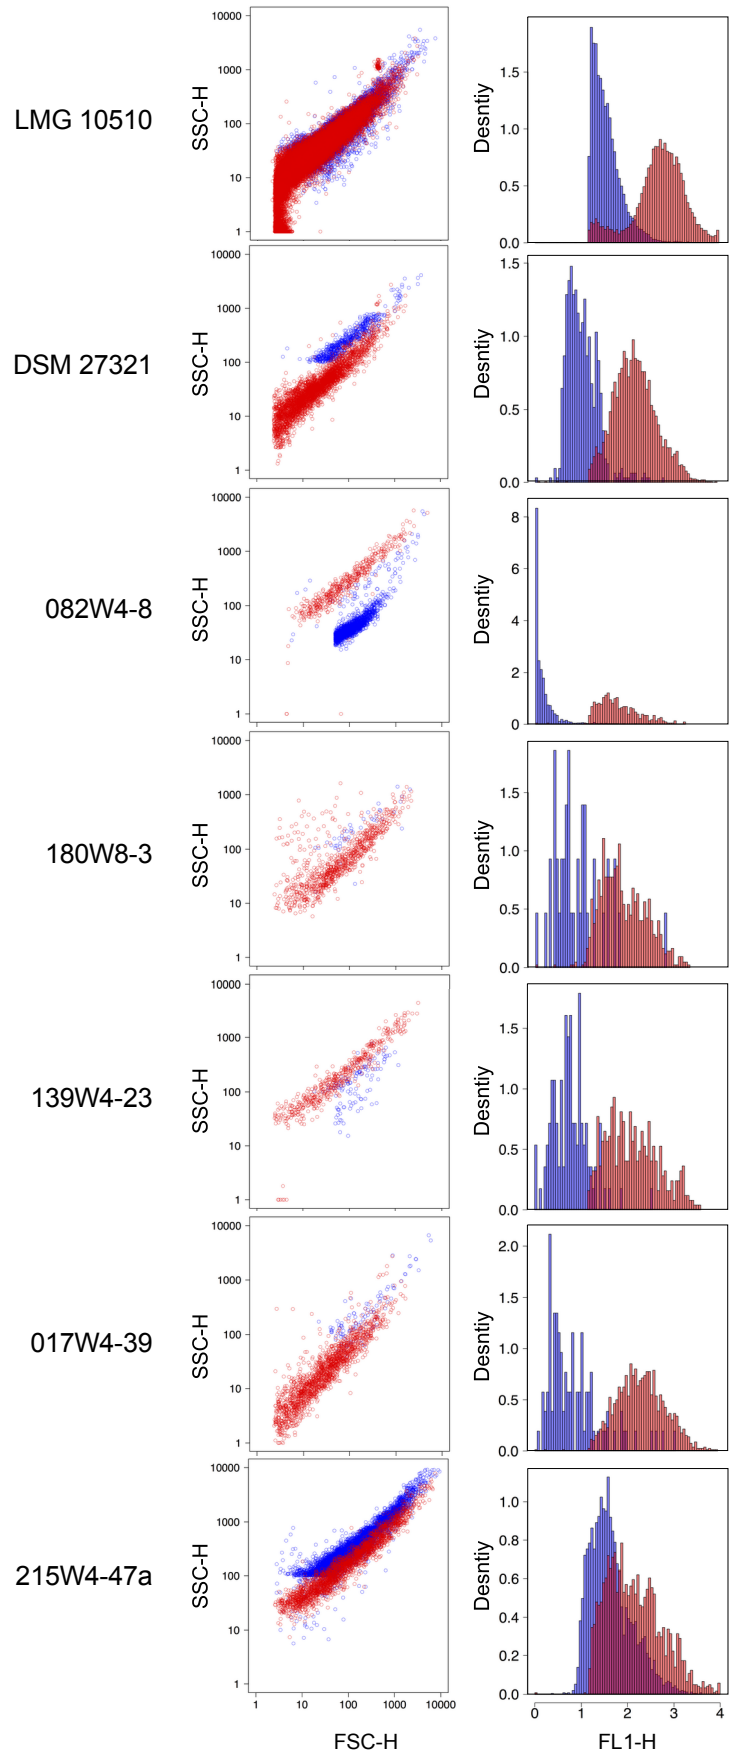

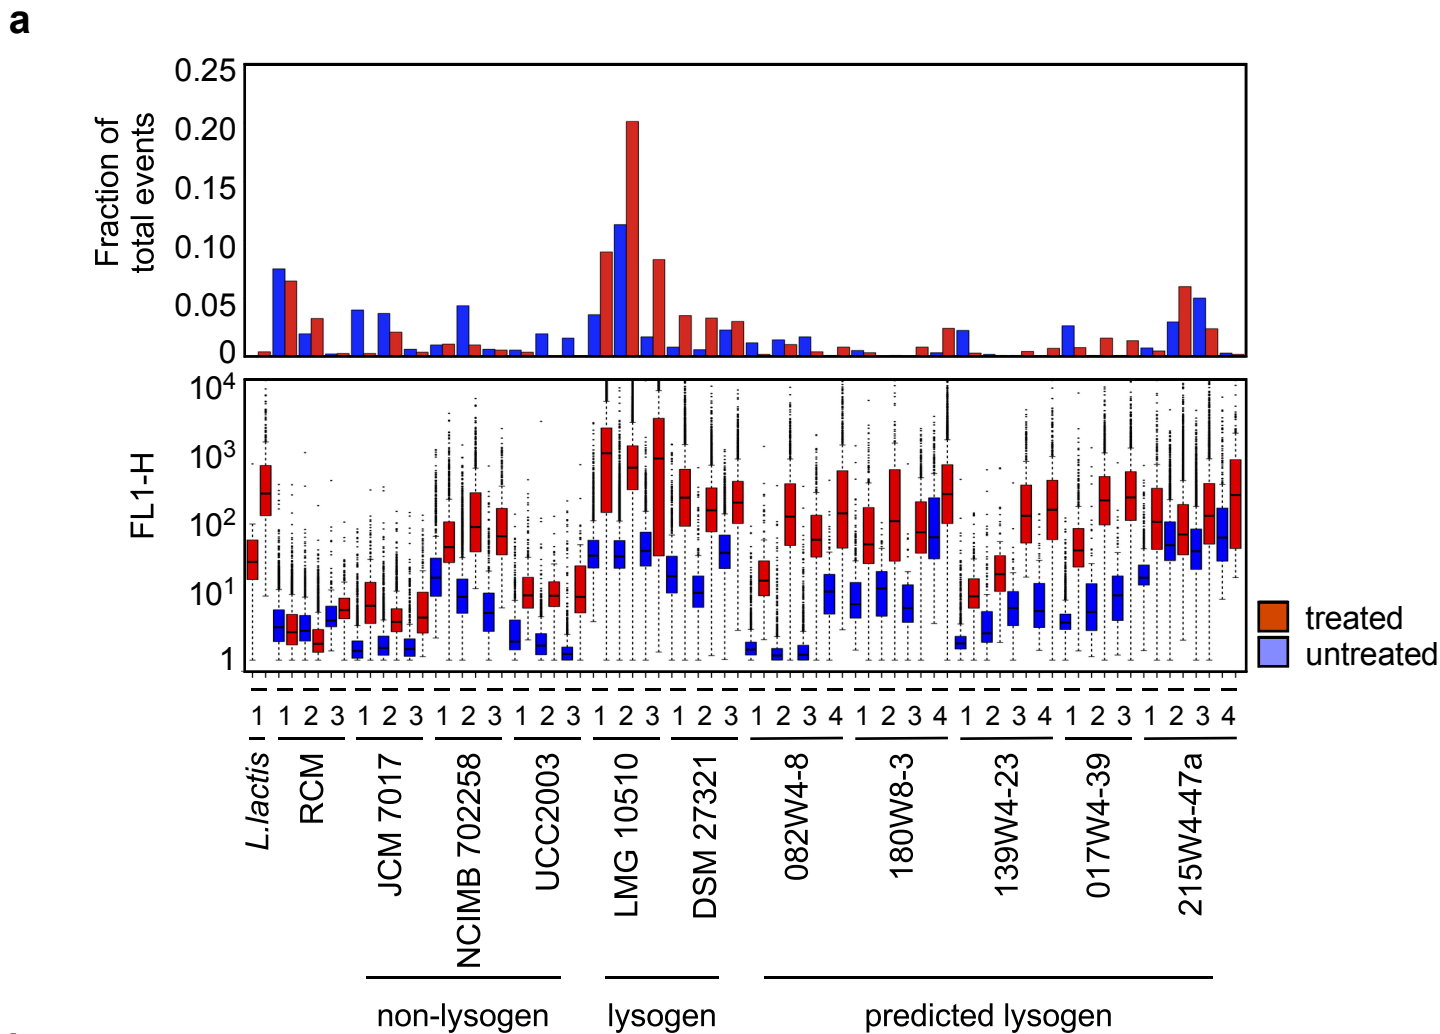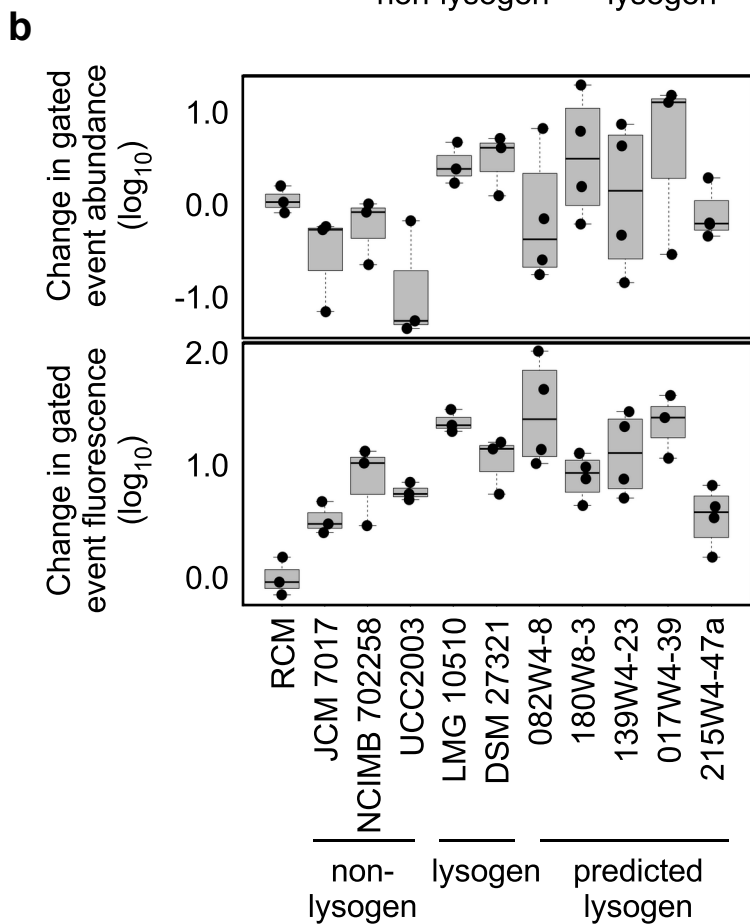

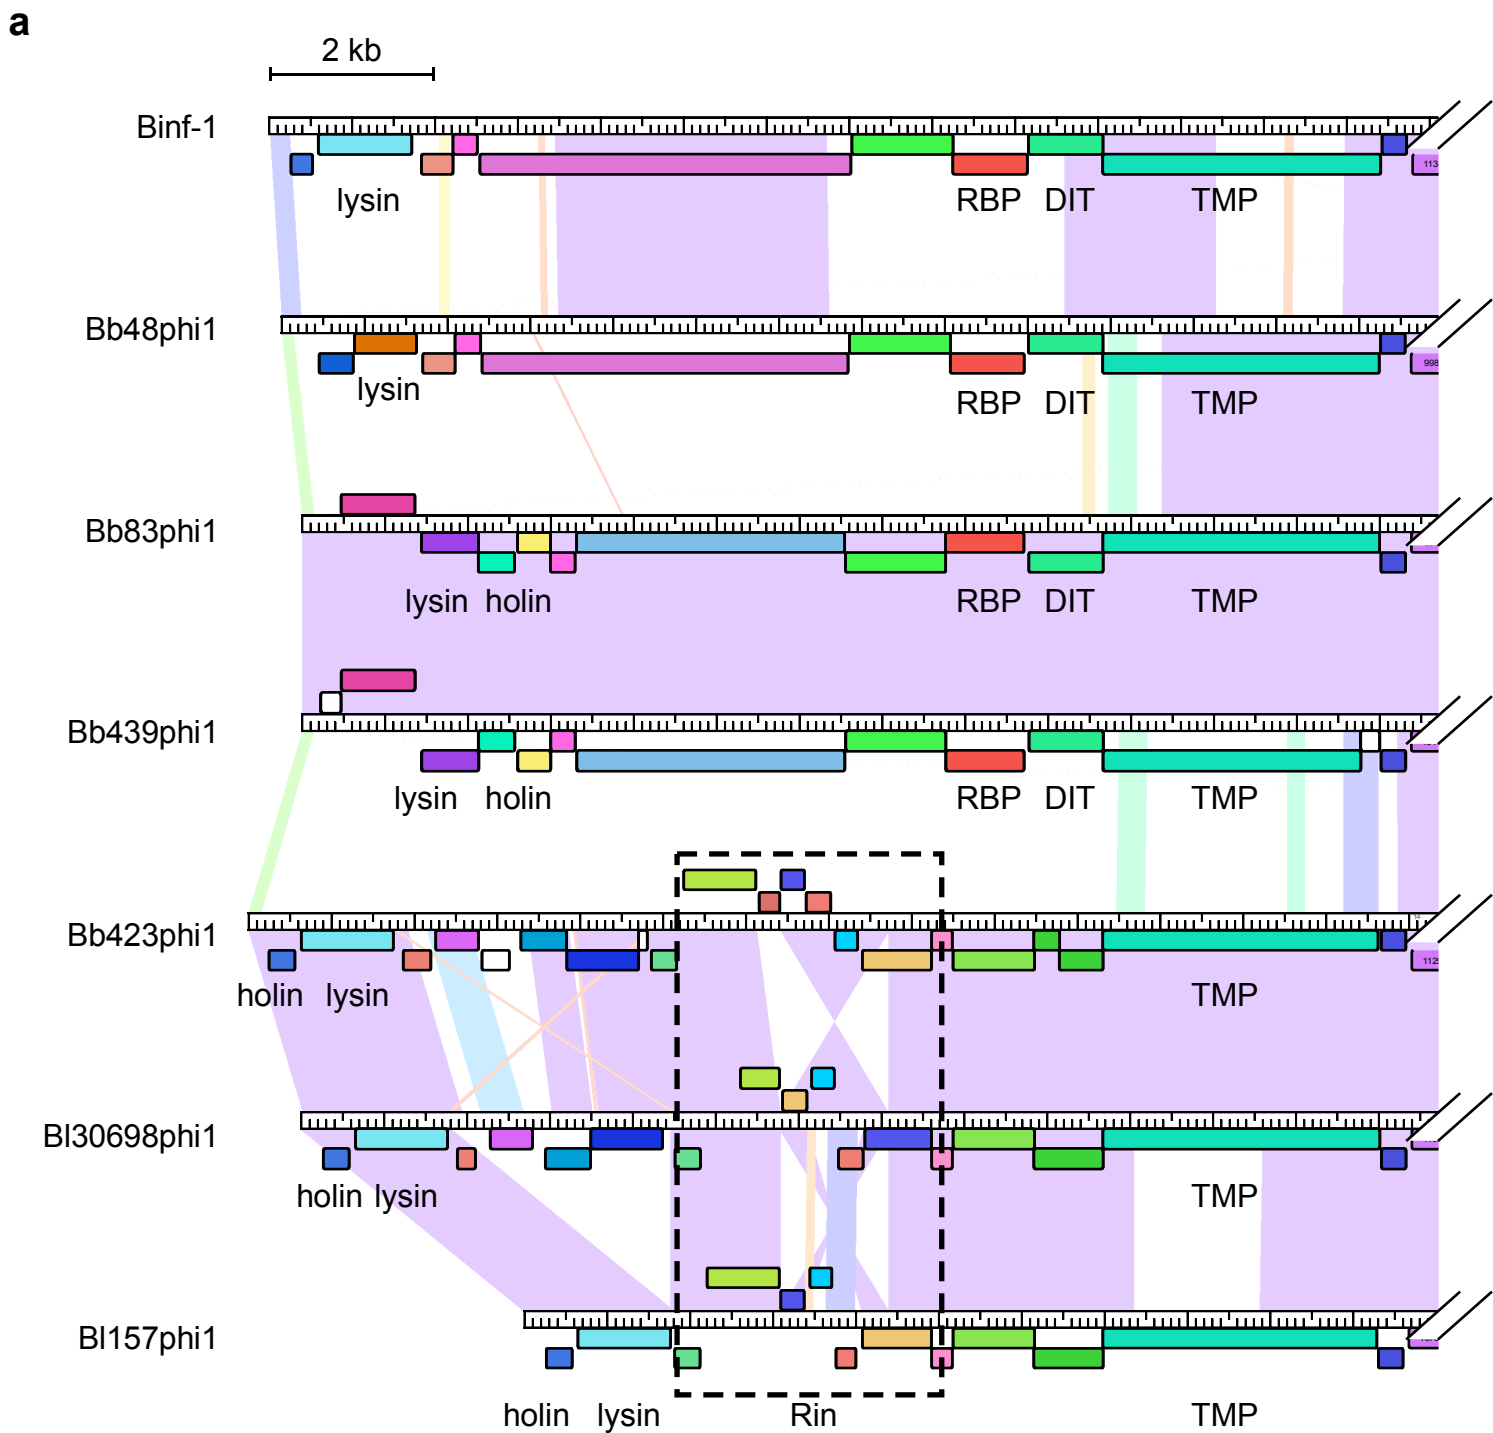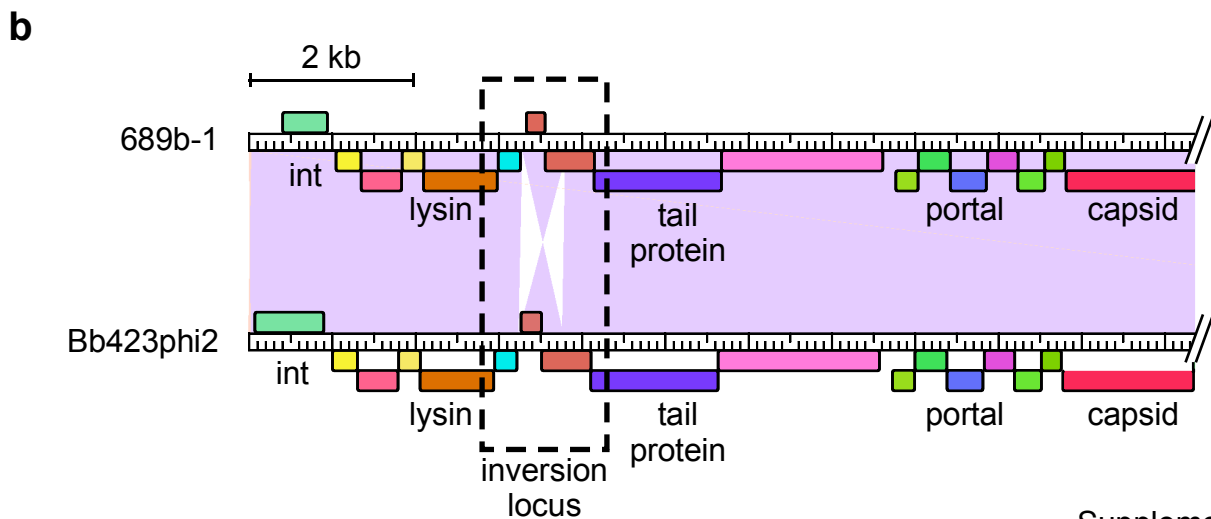

**a**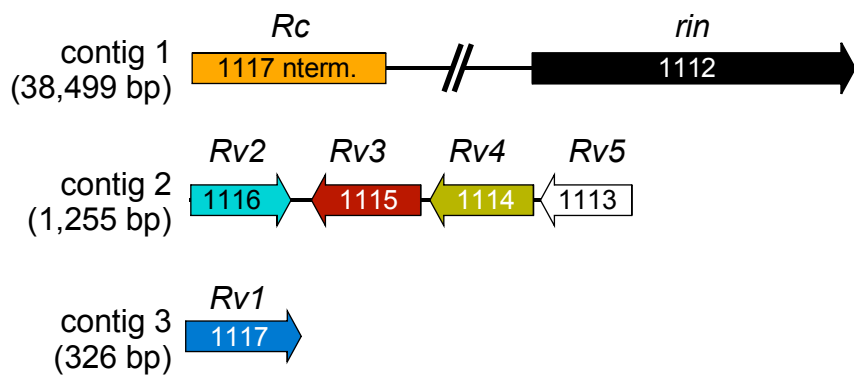**b**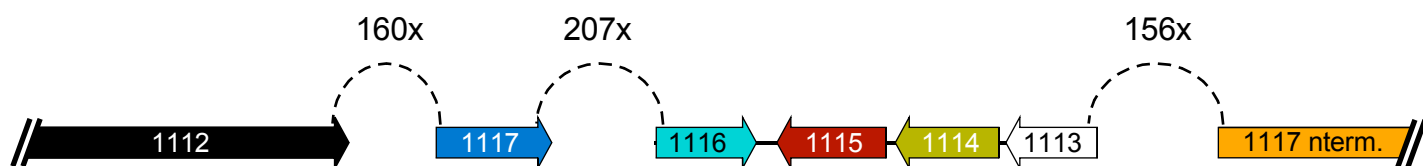**c**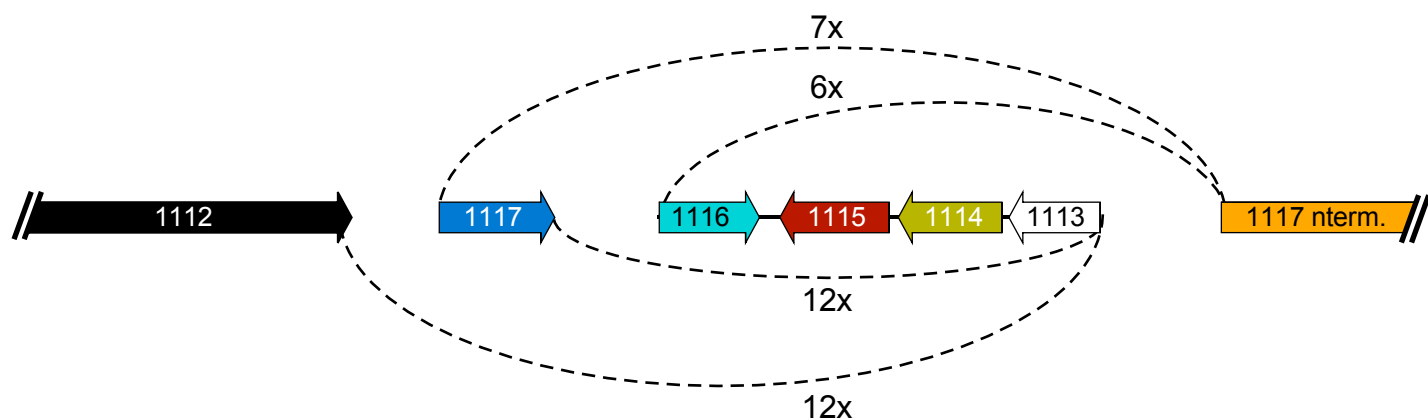**d**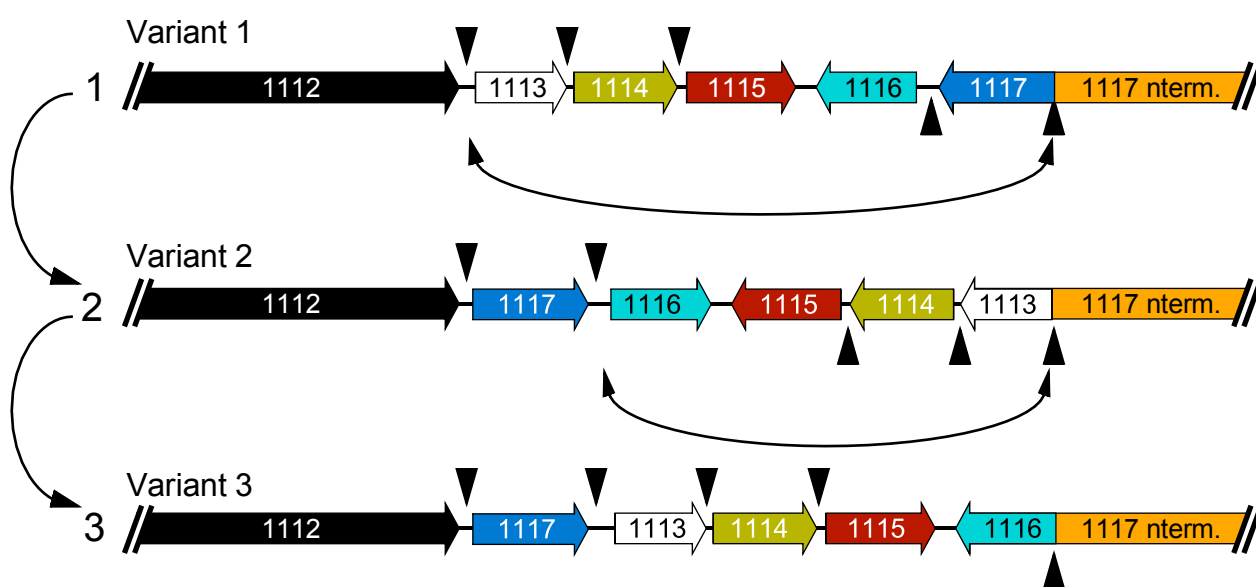

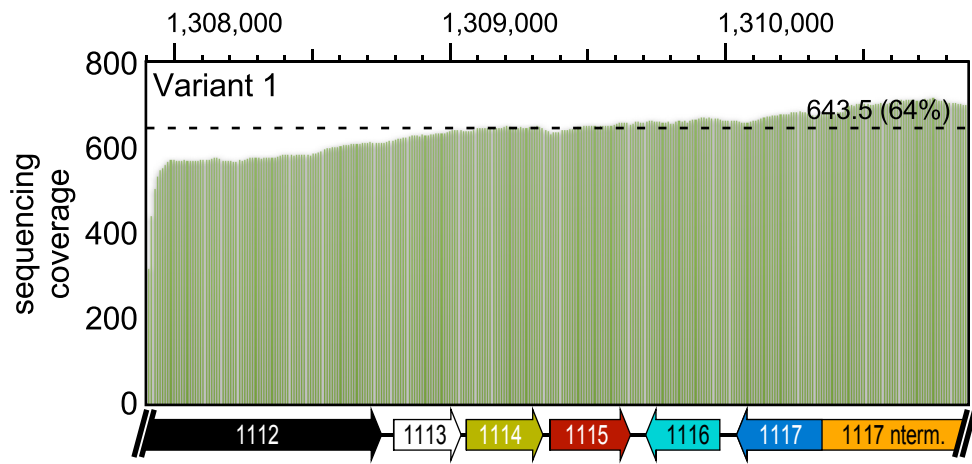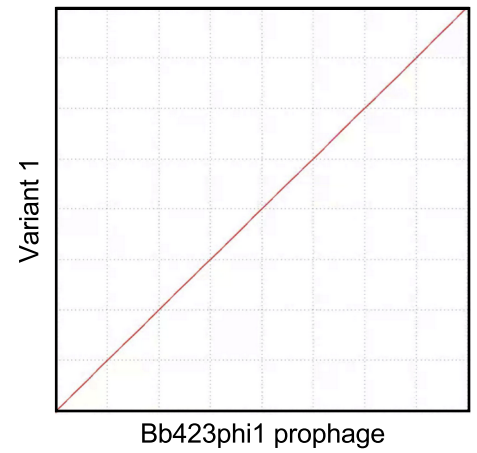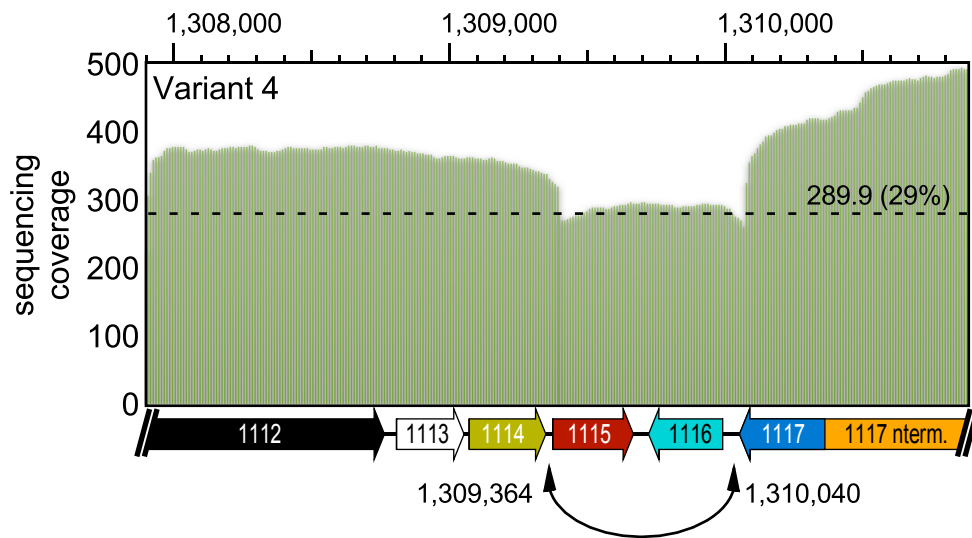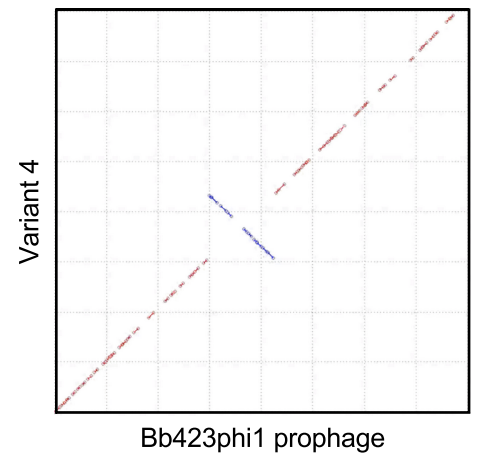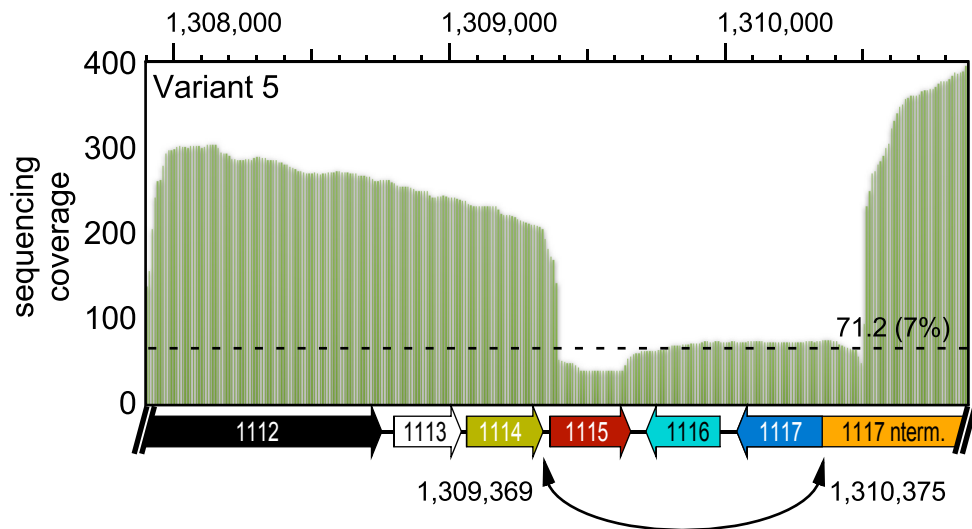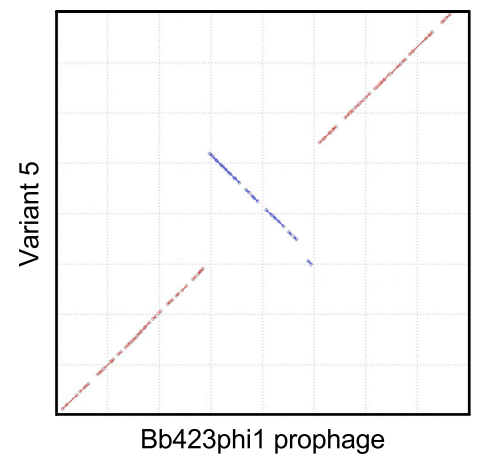



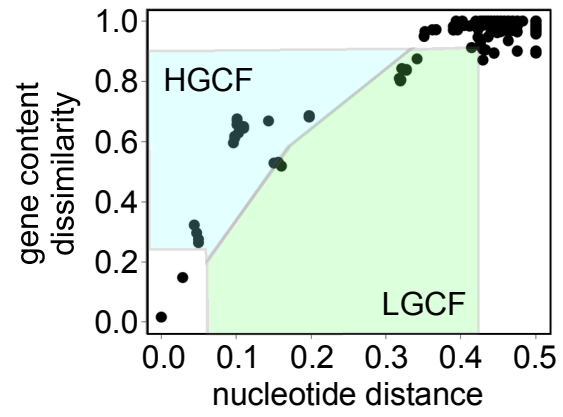

Supplement: 41598_2018_31181_MOESM1_ESM.pdf [file 41598_2018_31181_MOESM1_ESM.pdf]
